# Supplementary material for: Prevalence and Characterization of PVL-Positive Staphylococcus aureus Isolated from Raw Cow’s Milk
Source: MDPI journal article supplement (doi:10.3390/toxins14020097), 2022-01-25

# Supplementary Materials: Prevalence and Characterization of PVL-Positive *Staphylococcus aureus* Isolated from Raw Cow's Milk

Asmaa Sadat, Radwa Reda Shata, Alshimaa M. M. Farag Hazem Ramadan, Adel Alkhedaide, Mohamed Mohamed Soliman, Mohamed Elbadawy, Amira Abugomaa and Amal Awad

**Table S1.** Virulence gene profiles and genotypic profiles of  $\beta$ -lactam resistance among Pantone-Valentine Leukocidin (PVL)-positive *Staphylococcus aureus* strains.

| Genotype | Gene pattern                          | No. of isolates (%) |
|----------|---------------------------------------|---------------------|
| I        | <i>pvl</i>                            | 1 (0.88%)           |
| II       | <i>pvl, blaZ</i>                      | 13 (11.5%)          |
| III      | <i>pvl, hla</i>                       | 5 (4.4%)            |
| IV       | <i>pvl, mecA</i>                      | 1 (0.88%)           |
| V        | <i>pvl, sea</i>                       | 3 (2.65%)           |
| VI       | <i>pvl, blaZ, hla</i>                 | 23 (20.35%)         |
| VII      | <i>pvl, blaZ, sea</i>                 | 13 (11.5%)          |
| VIII     | <i>pvl, blaZ, seb</i>                 | 2 (1.77 %)          |
| IX       | <i>pvl, hla, sea</i>                  | 2 (1.77 %)          |
| X        | <i>pvl, mecA, hla</i>                 | 3 (2.65%)           |
| XI       | <i>pvl, mecA, sea</i>                 | 1 (0.88%)           |
| XII      | <i>pvl, mecA, blaZ</i>                | 4 (3.54%)           |
| XIII     | <i>pvl, mecA, blaZ, sea</i>           | 11 (9.7%)           |
| XIV      | <i>pvl, mecA, blaZ, hla</i>           | 6 (5.31%)           |
| XV       | <i>pvl, mecA, blaZ, seb</i>           | 1 (0.88%)           |
| XVI      | <i>pvl, mecA, blaZ, sec</i>           | 1 (0.88%)           |
| XVII     | <i>pvl, mecA, hla, sea</i>            | 1 (0.88%)           |
| XVIII    | <i>pvl, blaZ, hla, sea</i>            | 11 (9.7%)           |
| XIX      | <i>pvl, blaZ, hla, seb</i>            | 2 (1.77 %)          |
| XX       | <i>pvl, blaZ, hla, sea, seb</i>       | 1 (0.88%)           |
| XXI      | <i>pvl, mecA, blaZ, hla, sea</i>      | 6 (5.31%)           |
| XXII     | <i>pvl, mecA, blaZ, hla, seb</i>      | 1 (0.88%)           |
| XXIII    | <i>pvl, mecA, blaZ, hla, sea, tst</i> | 1 (0.88%)           |

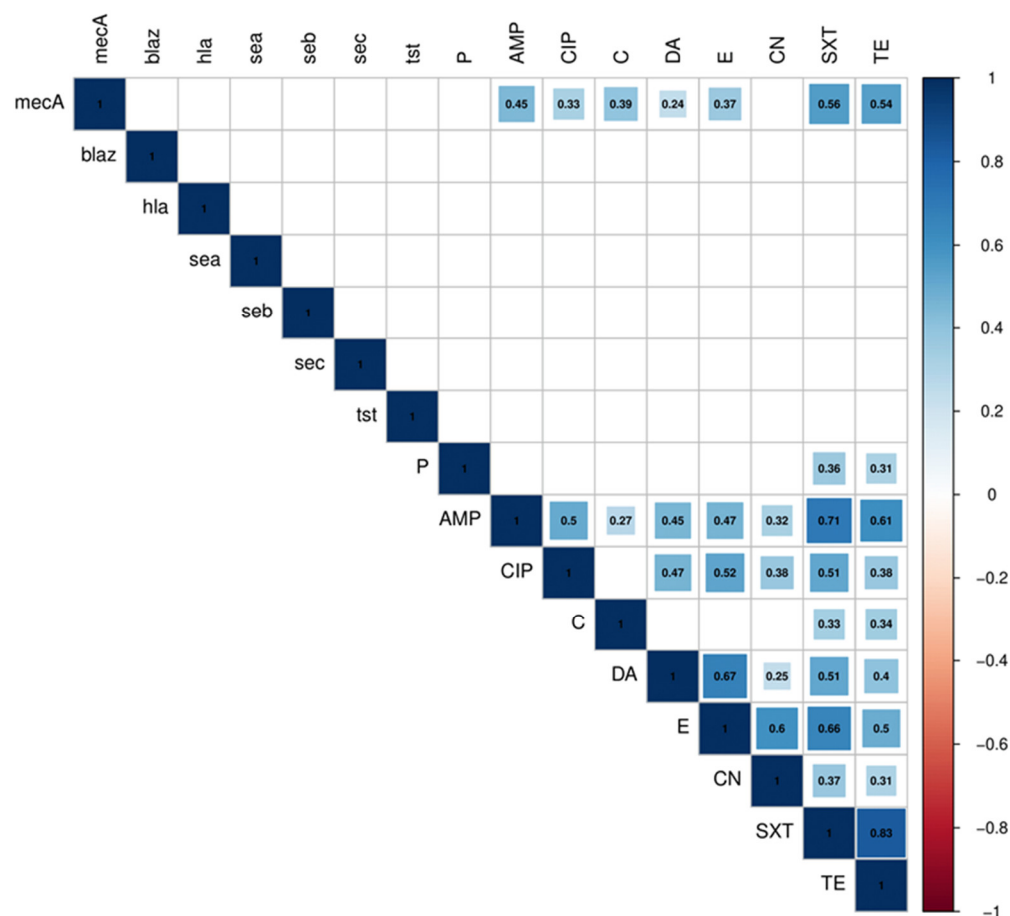

**Figure S1.** Association between resistance phenotypes, resistant genes, and virulence-associated genes in Pantone-Valentine Leukocidin (PVL)-positive *Staphylococcus aureus* showing a significant correlation. The blue and orange colors of boxes indicate positive and negative correlation, respectively. The strength of the colors corresponds to the numerical value of the correlation coefficient ( $r$ ). Hla: alpha-hemolysin encoding gene blaZ: penicillinase encoding gene mecA: penicillin-binding protein (PBP2-a) encoding gene and accounts for methicillin-resistance tst: toxic shock syndrome toxin TSST-1 encoding gene. sea, seb, sec, see, Seg, sei, selj: Staphylococcus enterotoxins encoding genes nuc: *S. aureus*-specific thermonuclease encoding gene P: Penicillin AMP: Ampicillin CIP: Ciprofloxacin C: Chloramphenicol DA: Clindamycin E: Erythromycin CN: Gentamicin TE: Tetracycline SXT: Trimethoprim-sulfamethoxazole

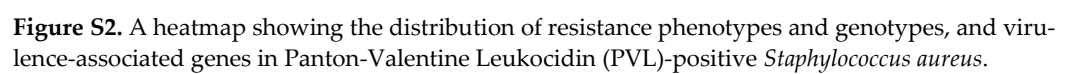

Supplement: s1 [file s1]
